# Supplementary material for: Verification of the Chromosome Region 9q21 Association with Pelvic Organ Prolapse Using RegulomeDB Annotations
Source: PubMed Central journal article supplement (PMC4546950; doi:10.1155/2015/837904), 2015-08-10
Supplement: 837904.f1.pdf [file 837904.f1.pdf]

**Verification of the chromosome region 9q21 association with pelvic organ prolapse  
using RegulomeDB annotations**

Maryam B. Khadzhieva, Dmitry S. Kolobkov, Svetlana V. Kamoeva, Anastasia V. Ivanova,  
Serikbay K. Abilev, and Lyubov E. Salnikova

**Supplementary Materials**

SupplementaryTable 1. Summary on primer sequences<sup>a</sup>, amplicons, and PCR cycling  
conditions for individual SNPs analyzed in the study

| rs# of SNP | Primer sequences 5'-3',<br>external forward/reverse, internal<br>allele-specific forward/reverse | PCR <sup>b</sup> | Amplicon<br>length (bp) |
|------------|--------------------------------------------------------------------------------------------------|------------------|-------------------------|
| rs1455311  | F aagtcctacccatcgaggt                                                                            | 95°C (15s)       | 303                     |
|            | R ccggtataatgggatgtgg                                                                            | 62°C (15s)       |                         |
|            | F(t) ccatttctgaattacagagggt                                                                      | 72 °C (20s)      | 150                     |
|            | R(c) caggaaccttaatgaaaaatcaatag                                                                  | 32 ×             | 200                     |
| rs1036819  | F aaagcccatgctctgacctta                                                                          | 95°C (15s)       | 404                     |
|            | Rttttagtctctgggagagaatgct                                                                        | 60°C (15s)       |                         |
|            | F(c)cacttttctgtctgtagcataaac                                                                     | 72°C (20s)       | 288                     |
|            | R(a) ggttctgttttaattgaatgcctt                                                                    | 31 ×             | 165                     |
| rs4077632  | F ggctagctcctgggaacaac                                                                           | 95 °C (15s)      | 560                     |
|            | R tgcaagctgtcatcagcata                                                                           | 60.6°C(14s)      |                         |
|            | F(a) gagcaaggtacctttgcttga                                                                       | 72°C(15s)        | 369                     |
|            | R(g) cgataagaattagagaatcgc                                                                       | 31 ×             | 232                     |
| rs2807303  | F cgtcccactccaacttttt                                                                            | 95 °C (15s)      | 344                     |
|            | R gtggtgttcgagagtttga                                                                            | 60 °C (20s)      |                         |

|            |                                   |               |     |
|------------|-----------------------------------|---------------|-----|
|            | F(c) cttttaccacatctcatttccttatttc | 72 °C (20s)   | 153 |
|            | R(t)gacaagaaaacaggaaggaagaa       | 31 ×          | 241 |
| rs2777781  | F tgacctaagttgataaatgaggaa        | 94 °C (15s)   | 343 |
|            | R tcctcttcaccttgtcagaa            | 62.3 °C (20s) |     |
|            | F(a) ggcatgaacaaggctccta          | 72 °C (22s)   | 227 |
|            | R(t) ctccattgtatctttgtcctgta      | 32 ×          | 159 |
| rs11139451 | F aaggaccattctaaagttgtggac        | 95 °C (15s)   | 341 |
|            | R actgatgcaataggacatgagata        | 61 °C (20s)   |     |
|            | F(t) agggaagaaagctgtct            | 72 °C (20s)   | 151 |
|            | R(c) caagagtctgtgtttctg           | 15 ×          | 226 |
|            |                                   | 95 °C (15s)   |     |
|            |                                   | 50.8 °C (20s) |     |
|            |                                   | 72 °C (15s)   |     |
|            |                                   | 16 ×          |     |
| rs12237222 | Fggatttaaccaggggccgttt            | 95 °C(15s)    | 370 |
|            | Rgcatccaagctccgcttct              | 66°C(15s)     |     |
|            | F(g)cttctgtgggttcccactgg          | 72 °C (15s)   | 149 |
|            | R(t)aaggacgaggctgtcca             | 30 ×          | 260 |
| rs12551710 | F aggactccagcccctagact            | 95 °C(15s)    | 334 |
|            | R cttggagtttacttggtgggaaa         | 63°C(15s)     |     |
|            | F(t) tccagtcctccactcacctat        | 72 °C (30s)   | 150 |
|            | R(c)cacagaacctgctgtggaagg         | 31 ×          | 225 |
| rs430794   | F ggtagtaagcctgcactctgc           | 95 °C (15s)   | 332 |
|            | R caactgagtggggagcattt            | 65.3°C (14s)  |     |
|            | F(c) catcagcttccagtgccacc         | 72 °C (14s)   | 216 |

|           |                                   |               |     |
|-----------|-----------------------------------|---------------|-----|
|           | R(a) gcagaacatcaagcaagttacagt     | 29 ×          | 159 |
| rs8027714 | F ccagcatcttctctctttagc           | 95 °C (15s)   | 277 |
|           | R acacatatgggcaaatgcag            | 61.2 °C (15s) |     |
|           | F(g) tcaaggaatcctaattctttatttag   | 72 °C (25s)   | 191 |
|           | R(a) ccagaactttgttcctataactattaat | 32 ×          | 140 |
| rs1810636 | F ggtgacagatcagcaaccac            | 95 °C (15s)   | 557 |
|           | R ctcaaccaggaggaagag              | 59 °C (15s)   |     |
|           | F(g) cctctaaacaattttttaaagcg      | 72 °C (25s)   | 236 |
|           | R(t) gacacactcaccaagcacata        | 30 ×          | 365 |
| rs2236479 | F gggctctagagggaacagtg            | 95 °C (15s)   | 379 |
|           | R cctctgacctccctgtcg              | 59.6 °C (20s) |     |
|           | F(a) cgtgtcctcagaacgaa            | 72 °C (30s)   | 168 |
|           | R(g) ctgtcctgcatgtcatcc           | 31 ×          | 246 |

<sup>a</sup>The Primer3 algorithm was used to design external primer sequences.

<sup>b</sup>PCR conditions are provided as temperature (duration) of denaturation, annealing and extension phase, respectively, followed by the number of cycles for a given SNP. Each PCR reaction was finished by a final extension phase lasting 5 min.

Supplementary Table 2. Characteristics of the POP and control groups involved in the study

| Characteristics                                                                             | Control       | POP           | <i>P</i> <sup>e</sup>        |
|---------------------------------------------------------------------------------------------|---------------|---------------|------------------------------|
|                                                                                             | N (%)         | N (%)         |                              |
|                                                                                             | Mean ± SD     | Mean ± SD     |                              |
| Total number                                                                                | 292           | 210           |                              |
| POP-Q stage                                                                                 |               |               |                              |
| Without POP                                                                                 | 292 (100)     | 0 (0.00)      |                              |
| Stage I                                                                                     | 0 (0.00)      | 0 (0.00)      |                              |
| Stage II                                                                                    | 0 (0.00)      | 0 (0.00)      |                              |
| Stage III                                                                                   | 0 (0.00)      | 194 (92.38)   |                              |
| Stage IV                                                                                    | 0 (0.00)      | 16 (7.62)     |                              |
| Age <sup>a</sup>                                                                            | 57.25 ± 12.70 | 57.65 ± 10.80 | 0.68                         |
| BMI (kg/m <sup>2</sup> ) <sup>b</sup>                                                       | 27.46 ± 6.56  | 29.17 ± 5.85  | <b>5.6 × 10<sup>-4</sup></b> |
| Vaginal parity <sup>c</sup>                                                                 |               |               |                              |
| 0                                                                                           | 57 (20.73)    | 4 (1.96)      | <b>0.014<sup>f</sup></b>     |
| 1                                                                                           | 112 (40.73)   | 79 (38.73)    |                              |
| 2                                                                                           | 100 (36.36)   | 96 (47.06)    |                              |
| ≥3                                                                                          | 6 (2.18)      | 25 (12.25)    |                              |
| Perineal trauma in childbirth (episiotomy and spontaneous perineal laceration) <sup>d</sup> | 93 (32.75)    | 107 (52.45)   | <b>1.7 × 10<sup>-5</sup></b> |

Data are missing for: <sup>a</sup>8 controls, 6 POP patients; <sup>b</sup>11 controls, 12 POP patients; <sup>c</sup>17 controls, 6 POP patients; <sup>d</sup>91 controls, 51 POP patients.

<sup>e</sup>Significant results are in bold.

<sup>f</sup>We compared two groups: 0-1 vaginal birth vs. ≥ 2 vaginal birth.

Supplementary Table 3. The distribution of genotypes among cases and controls

| SNPs and genotypes | Control    |      | POP        |      | Crude<br>P- value,<br>OR,<br>(95% CI) | Adjusted<br>P- value <sup>a</sup> ,<br>OR,<br>(95% CI) |
|--------------------|------------|------|------------|------|---------------------------------------|--------------------------------------------------------|
|                    | Number (%) | HWP  | Number (%) | HWP  |                                       |                                                        |
| rs1455311          | n=287      |      | n=210      |      |                                       |                                                        |
| T/T                | 187 (65.2) |      | 146 (69.5) |      | 0.24 (add)                            | 0.10 (add)                                             |
| T/C                | 91 (31.7)  | 0.70 | 60 (28.6)  | 0.61 | 0.82                                  | 0.72                                                   |
| C/C                | 9 (3.1)    |      | 4 (1.9)    |      | (0.58 – 1.15)                         | 0.48 – 1.07                                            |
| rs1036819          | n=290      |      | n=211      |      |                                       |                                                        |
| A/A                | 232 (80.0) |      | 156 (74.3) |      | 0.13 (dom)                            | 0.11 (dom)                                             |
| A/C                | 54 (18.6)  | 0.55 | 50 (23.8)  | 1.00 | 1.38                                  | 1.49                                                   |
| C/C                | 4 (1.4)    |      | 4 (1.9)    |      | (0.91 – 2.11)                         | 0.92 – 2.41                                            |
| rs4077632          | n=291      |      | n=209      |      |                                       |                                                        |
| A/A                | 128 (44.0) |      | 79 (37.8)  |      | 0.094 (add)                           | 0.22 (add)                                             |
| A/G                | 134 (46.0) | 0.51 | 101 (48.3) | 0.77 | 1.26                                  | 1.20                                                   |

|            |     |            |      |            |      |               |               |
|------------|-----|------------|------|------------|------|---------------|---------------|
| rs2807303  | G/G | 29 (10.0)  |      | 29 (13.9)  |      | (0.96 – 1.64) | (0.89 – 1.62) |
|            |     | n=285      |      | n=210      |      |               |               |
|            | C/C | 102 (35.8) |      | 80 (38.1)  |      | 0.19 (rec)    | 0.38 (rec)    |
|            | C/T | 142 (49.8) | 0.53 | 108 (51.4) | 0.13 | 0.79          | 0.76          |
| rs2777781  | T/T | 41 (14.4)  |      | 22 (10.5)  |      | (0.40 – 1.21) | (0.41 – 1.40) |
|            |     | n=292      |      | n=210      |      |               |               |
|            | A/A | 154 (52.7) |      | 111 (52.9) |      | 0.25 (rec)    | 0.56 (rec)    |
|            | A/T | 122 (41.8) | 0.23 | 82 (39.0)  | 0.73 | 1.52          | 1.25          |
| rs11139451 | T/T | 16 (5.5)   |      | 17 (8.1)   |      | (0.75 – 3.08) | (0.59 – 2.67) |
|            |     | n=291      |      | n=210      |      |               |               |
|            | T/T | 185 (63.6) |      | 131 (62.4) |      | 0.78 (dom)    | 0.74 (dom)    |
|            | T/C | 88 (30.2)  | 0.11 | 70 (33.3)  | 1.00 | 1.05          | 1.07          |
| rs12551710 | C/C | 18 (6.2)   |      | 9 (4.3)    |      | (0.73 – 1.52) | (0.71 – 1.62) |
|            |     | n=291      |      | n=210      |      |               |               |
|            | C/C | 233 (80.1) |      | 171 (81.4) |      | 0.58 (add)    | 0.70 (add)    |
|            | C/T | 56 (19.2)  | 0.75 | 39 (18.6)  | 0.23 | 0.88          | 0.91          |

|           |     |            |      |            |      |               |               |
|-----------|-----|------------|------|------------|------|---------------|---------------|
| rs430794  | T/T | 2 (0.7)    |      | 0 (0.0)    |      | (0.57 – 1.37) | (0.56 – 1.47) |
|           |     | n=289      |      | n=210      |      |               |               |
|           | C/C | 148 (51.2) |      | 122 (58.1) |      | 0.13 (dom)    | 0.11 (dom)    |
|           | C/A | 113 (39.1) | 0.39 | 72 (34.3)  | 0.27 | 0.76          | 0.72          |
| rs8027714 | A/A | 28 (9.7)   |      | 16 (7.6)   |      | (0.53 – 1.08) | (0.49 – 1.08) |
|           |     | n=290      |      | n=210      |      |               |               |
|           | G/G | 278 (95.9) |      | 197 (93.8) |      | 0.30 (dom)    | 0.27 (dom)    |
|           | G/A | 12 (4.1)   | 1.00 | 13 (6.2)   | 1.00 | 1.53          | 1.66          |
| rs1810636 | A/A | 0 (0.0)    |      | 0 (0.0)    |      | (0.68 – 3.42) | (0.67 – 4.09) |
|           |     | n=290      |      | n=210      |      |               |               |
|           | G/G | 119 (41.0) |      | 101 (48.1) |      | 0.12 (dom)    | 0.25 (dom)    |
|           | G/T | 144 (49.7) | 0.09 | 91 (43.3)  | 0.75 | 0.75          | 0.79          |
| rs2236479 | T/T | 27 (9.3)   |      | 18 (8.6)   |      | (0.53 – 1.07) | (0.53 – 1.18) |
|           |     | n=287      |      | n=207      |      |               |               |
|           | G/G | 131 (45.6) |      | 81 (39.1)  |      | 0.14 (add)    | 0.097 (add)   |
|           | A/G | 120 (41.8) | 0.29 | 94 (45.4)  | 0.66 | 1.22          | 1.28          |

|     |           |           |               |               |
|-----|-----------|-----------|---------------|---------------|
| A/A | 36 (12.5) | 32 (15.5) | (0.94 – 1.57) | (0.96 – 1.71) |
|-----|-----------|-----------|---------------|---------------|

HWP, Hardy– Weinberg probability; OR, odds ratio; CI, confidence interval; rec, recessive model; dom, dominant model; add, additive model.

<sup>a</sup>Adjusted by age, body mass index (BMI), perineal trauma in childbirth and vaginal parity. In the multivariate analysis, the number of cases and controls may be less than in the crude analysis since some subjects had insufficient data on covariates.



Supplementary Table 4. Linkage disequilibrium analysis of six SNPs in the region 9q21

| D'               | rs11139451 | rs12237222            | rs12551710            | rs2777781 | rs2807303 |
|------------------|------------|-----------------------|-----------------------|-----------|-----------|
| <i>P</i> - value |            |                       |                       |           |           |
| rs4077632        | 0.149      | 0.034                 | 0.323                 | 0.009     | 0.022     |
|                  | 0.073      | 0.367                 | $4.17 \times 10^{-6}$ | 0.895     | 0.515     |
| rs11139451       |            | 0.257                 | 0.129                 | 0.236     | 0.0007    |
|                  |            | $1.45 \times 10^{-6}$ | 0.009                 | 0.019     | 0.988     |
| rs12237222       |            |                       | 0.266                 | 0.052     | 0.098     |
|                  |            |                       | 0.001                 | 0.252     | 0.035     |
| rs12551710       |            |                       |                       | 0.043     | 0.373     |
|                  |            |                       |                       | 0.456     | 0.002     |
| rs2777781        |            |                       |                       |           | 0.177     |
|                  |            |                       |                       |           | 0.008     |

D' and *P* – value for linkage are given for every pair of SNPs.

Supplementary Table 5. Fst pairwise values between populations

| Pops | CHD    | GIH    | JPT    | TSI    | YRI    | RUS    | MEX    | LWK    |
|------|--------|--------|--------|--------|--------|--------|--------|--------|
| CEU  | 0.1108 | 0.0324 | 0.0753 | 0      | 0.1574 | 0      | 0.0236 | 0.1654 |
| CHD  |        | 0.0492 | 0.0148 | 0.1302 | 0.1951 | 0.1104 | 0.0712 | 0.1822 |
| GIH  |        |        | 0.029  | 0.0435 | 0.1548 | 0.0297 | 0.0159 | 0.1341 |
| JPT  |        |        |        | 0.079  | 0.1749 | 0.0689 | 0.0499 | 0.1562 |
| TSI  |        |        |        |        | 0.1681 | 0.0017 | 0.0281 | 0.1638 |
| YRI  |        |        |        |        |        | 0.1482 | 0.1148 | 0.0093 |
| RUS  |        |        |        |        |        |        | 0.0256 | 0.1575 |
| MEX  |        |        |        |        |        |        |        | 0.101  |
